# Supplementary material for: Comparison of genotype clustering tools with rare variants
Source: PubMed Central journal article supplement (PMC3941951; doi:10.1186/1471-2105-15-52), 2014-02-21
Supplement: 1471-2105-15-52-S1.pdf [file 1471-2105-15-52-S1.pdf]

# Comparison of genotype clustering tools with rare variants

## Additional Materials

Lemieux Perreault L.-P., Legault M.-A., Barhdadi A., Provost S.,  
Normand V., Tardif J.-C. and Dubé M.-P.

### Supplemental Equation 1 - Error rate for rare markers

The genotypic model for error rate estimation was tested by Liu *et al.* for common variants only. However, we found that the possible values of  $\epsilon$  were out of bound (*i.e.* negative or above one) for a majority of rare markers. For those cases,  $\epsilon$  was approximated using  $\epsilon \simeq (C_1 - C_3 + 1)/3$ , as described below.

$$C_1 = p_1^2(1 - 2\epsilon) + 2p_1p_2\epsilon + p_2^2\epsilon \quad (\text{S1})$$

$$C_3 = p_1^2\epsilon + 2p_1p_2\epsilon + p_2^2(1 - 2\epsilon) \quad (\text{S2})$$

$$\begin{aligned} C_1 - C_3 &= p_1^2(1 - 2\epsilon) + 2p_1p_2\epsilon + p_2^2\epsilon - p_1^2\epsilon - 2p_1p_2\epsilon - p_2^2(1 - 2\epsilon) \\ &= p_1^2(1 - 2\epsilon) + p_2^2\epsilon - p_1^2\epsilon - p_2^2(1 - 2\epsilon) \\ &= p_1^2 - 2p_1^2\epsilon + p_2^2\epsilon - p_1^2\epsilon - p_2^2 + 2p_2^2\epsilon \\ &= p_1^2 - 3p_1^2\epsilon + 3p_2^2\epsilon - p_2^2 \\ &= (p_1^2 - p_2^2) - 3(p_1^2 - p_2^2)\epsilon \\ &= (1 - 3\epsilon)(p_1^2 - p_2^2) \\ &= (1 - 3\epsilon)(p_1 - p_2)(p_1 + p_2) \\ &= (1 - 3\epsilon)(p_1 - (1 - p_1)) \end{aligned} \quad (\text{S3})$$

$$C_1 - C_3 = (1 - 3\epsilon)(2p_1 - 1) \quad (\text{S3})$$

$$2p_1 - 1 = \frac{C_1 - C_3}{1 - 3\epsilon}$$

$$2p_1 = \frac{C_1 - C_3}{1 - 3\epsilon} + 1$$

$$p_1 = \frac{1}{2} \left( \frac{C_1 - C_3}{1 - 3\epsilon} \right) + \frac{1}{2} \quad (\text{S4})$$

$$\text{if } p_1 \approx 0 \Rightarrow \frac{1}{2} \left( \frac{C_1 - C_3}{1 - 3\epsilon} \right) + \frac{1}{2} \approx 0$$

$$\Rightarrow \frac{C_1 - C_3}{1 - 3\epsilon} + 1 \approx 0$$

$$\Rightarrow C_1 - C_3 + 1 - 3\epsilon \approx 0$$

$$\Rightarrow C_1 - C_3 + 1 \approx 3\epsilon$$

$$\Rightarrow \epsilon \approx \frac{C_1 - C_3 + 1}{3} \quad (\text{S5})$$

## Supplemental Table 1 - Overall agreement probability and Cohen's $\kappa$ calculation

**Table S1: Overall agreement probability and Cohen's  $\kappa$  calculation.** Distribution of  $n$  samples by calling tool in  $q$  categories. The set of possible categories are all possible genotypes (*i.e.*  $q \in \{AA, AB, BB, 00\}$ , where 00 represents the *no call* category). This table is computed for each marker and for each pair of calling tools. The overall agreement probability and Cohen's  $\kappa$  are shown in Equation 1 and 2 of the main text, respectively.

| Tool A   | Tool B   |          |     |          | Total    |
|----------|----------|----------|-----|----------|----------|
|          | 1        | 2        | ... | $q$      |          |
| 1        | $n_{11}$ | $n_{12}$ | ... | $n_{1q}$ | $n_{A1}$ |
| 2        | $n_{21}$ | $n_{22}$ | ... | $n_{2q}$ | $n_{A2}$ |
| $\vdots$ |          |          | ... |          | $\vdots$ |
| $q$      | $n_{q1}$ | $n_{q2}$ | ... | $n_{qq}$ | $n_{Aq}$ |
| Total    | $n_{B1}$ | $n_{B2}$ | ... | $n_{Bq}$ | $n$      |

## Supplemental Table 2 - Fleiss' $\pi$ calculation

**Table S2: Fleiss'  $\pi$  calculation.** Distribution of  $r$  calling tools by  $n$  samples and  $q$  response categories. The set of possible categories are all possible genotypes (*i.e.*  $q \in \{AA, AB, BB, 00\}$ , where 00 represents the *no call* category). This table is computed for each marker and for each calling tool. Fleiss'  $\pi$  is explained in Equation 3 of the main text.

| Sample   | Category |          |     |          | Total    |
|----------|----------|----------|-----|----------|----------|
|          | 1        | 2        | ... | $q$      |          |
| 1        | $r_{11}$ | $r_{12}$ | ... | $r_{1q}$ | $r$      |
| 2        | $r_{21}$ | $r_{22}$ | ... | $r_{2q}$ | $r$      |
| $\vdots$ |          |          | ... |          | $\vdots$ |
| $n$      | $r_{n1}$ | $r_{n2}$ | ... | $r_{nq}$ | $r$      |
| Total    | $r_{+1}$ | $r_{+2}$ | ... | $r_{+q}$ | $nr$     |

## Supplemental Table 3 - Call concordance with the 1000 Genomes Project (Fleiss' $\pi$ outliers)

**Table S3: Call concordance with the 1000 Genomes Project (Fleiss's  $\pi$  outliers).** Call concordance and number of compared markers for the three control replicates when compared to the 1000 Genomes Project for the markers that were outliers for their Fleiss'  $\pi$  values. The following four tools were compared: *GenCall* (optimized cluster file), *GenoSNP* (optimized), *optiCall* (without excluding markers failing Hardy-Weinberg) and *zCall*.

| Tool                | NA12763_R |        | NA12763_R1 |        | NA12763_R2 |        |
|---------------------|-----------|--------|------------|--------|------------|--------|
|                     | Rate      | Number | Rate       | Number | Rate       | Number |
| GenCall (optimized) | 0.989157  | 3,228  | 0.989151   | 3,226  | 0.989434   | 3,218  |
| GenoSNP (optimized) | 0.895096  | 3,079  | 0.908626   | 3,130  | 0.878186   | 3,021  |
| optiCall            | 0.851575  | 3,207  | 0.849688   | 3,200  | 0.830272   | 3,158  |
| zCall               | 0.984485  | 3,416  | 0.984485   | 3,416  | 0.984485   | 3,416  |
